# Supplementary material
Source: publisher figshare collection journal article supplement (https://karger.figshare.com/ndownloader/files/12785027)
Supplement: Supplementary file 1 [file 12785027]

| **GA** | **p5** | **p50** | **p95** | **number of volumes measured** |
| --- | --- | --- | --- | --- |
| 8+0 | 17.76 | 27.16 | 37.95 | 29 |
| 9+0 | 21.07 | 44.19 | 73.07 | 62 |
| 10+0 | 30.68 | 67.76 | 114.65 | 67 |
| 11+0 | 42.51 | 82.02 | 130.34 | 17 |
| 12+0 | 75.99 | 90.01 | 104.89 | 3 |

*Table S4: reference values of the volume of the midgut herniation (mm3); GA: gestational age*
